# Supplementary material
Source: PubMed Central journal article supplement (PMC11044847)
Supplement: NIHMS1960777-supplement-Supplementary_Material.pdf [file NIHMS1960777-supplement-Supplementary_Material.pdf]

## ***In vivo* volumetric depth-resolved imaging of cilia metachronal waves using dynamic optical coherence tomography: supplement**

**TIAN XIA,<sup>1</sup>  KOHEI UMEZU,<sup>1</sup>  DEIRDRE M. SCULLY,<sup>1</sup> SHANG WANG,<sup>2,3</sup>  AND IRINA V. LARINA<sup>1,\*</sup> **

<sup>1</sup>*Department of Integrative Physiology, Baylor College of Medicine, Houston, Texas 77030, USA*

<sup>2</sup>*Department of Biomedical Engineering, Stevens Institute of Technology, Hoboken, New Jersey 07030, USA*

<sup>3</sup>*swang148@stevens.edu*

*\*larina@bcm.edu*

---

This supplement published with Optica Publishing Group on 2 November 2023 by The Authors under the terms of the [Creative Commons Attribution 4.0 License](https://creativecommons.org/licenses/by/4.0/) in the format provided by the authors and unedited. Further distribution of this work must maintain attribution to the author(s) and the published article's title, journal citation, and DOI.

Supplement DOI: <https://doi.org/10.6084/m9.figshare.24184209>

Parent Article DOI: <https://doi.org/10.1364/OPTICA.499927>

# ***IN VIVO* VOLUMETRIC DEPTH-RESOLVED IMAGING OF CILIA METACHRONAL WAVE WITH DYNAMIC OPTICAL COHERENCE TOMOGRAPHY**

## **SUPPLEMENTARY INFORMATION**

Table S1- Paired measurements of cilia metachronal wave at the same spatial locations with bright-field video microscopy (BF) and OCT.

|                            |       |      |      |      |       |       |      |      |       |      |      |
|----------------------------|-------|------|------|------|-------|-------|------|------|-------|------|------|
| OCT<br>( $\mu\text{m/s}$ ) | 107.9 | 81.5 | 71.7 | 86.7 | 125.6 | 108.2 | 46.0 | 64.2 | 127.4 | 78.1 | 93.8 |
| BF<br>( $\mu\text{m/s}$ )  | 94.3  | 58.0 | 60.0 | 55.5 | 107.8 | 95.9  | 34.0 | 92.9 | 70.3  | 73.2 | 65.0 |

Table S2 – Measurements of cilia metachronal wave velocity at different temperatures.

|                             |       |       |       |       |       |       |       |       |       |       |
|-----------------------------|-------|-------|-------|-------|-------|-------|-------|-------|-------|-------|
| ROI #                       | 1     | 2     | 3     | 4     | 5     | 6     | 7     | 8     | 9     | 10    |
| 20°C<br>( $\mu\text{m/s}$ ) | 115.9 | 127.5 | 144.5 | 91.7  | 59.5  | 69.1  | 135.3 | 88.5  | 200.1 | 116.5 |
| 30°C<br>( $\mu\text{m/s}$ ) | 264.2 | 334.6 | 236.9 | 256.6 | 362.0 | 131.6 | 219.2 | 314.8 | 380.0 | 299.6 |
| 37°C<br>( $\mu\text{m/s}$ ) | 517.8 | 397.7 | 310.8 | 408.7 | 345.2 | 171.7 | 195.9 | 281.5 | 519.2 | 600.5 |

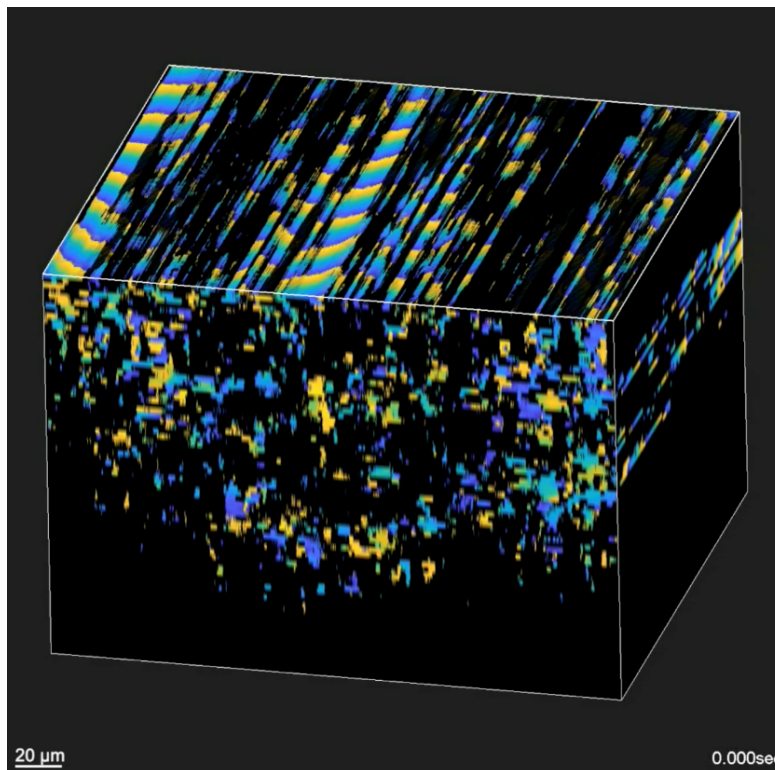

Video S1- Dynamic cilia metachronal wave visualization within the lumen of intact mouse fallopian tube using OCT as 2D over time.

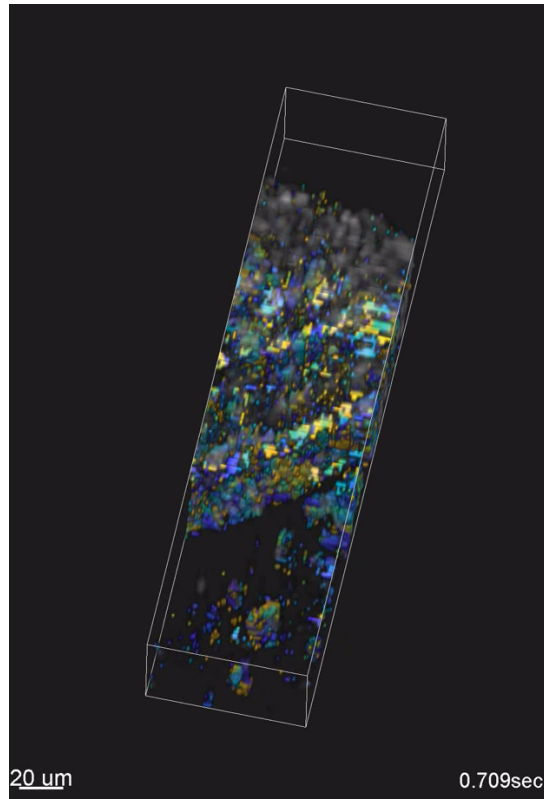

Video S2- Dynamic volumetric visualization of the cilia metachronal wave propagation in the mouse fallopian tube *ex vivo*.
